# Supplementary material for: Research Hotspots and Trends in Music Therapy Intervention for Patients With Dementia: A Bibliometrics and Visual Analysis of Papers Published From 2010 to 2021
Source: PubMed Central journal article supplement (PMC9098357; doi:10.3389/fpsyt.2022.860758), 2022-04-28
Supplement: Table_1.pdf [file Table_1.pdf]

# Supplementary Table

| NUMBER | KEYWORDS                         |
|--------|----------------------------------|
| 1      | dementia                         |
| 2      | Dementia                         |
| 3      | Alzheimer's disease              |
| 4      | music therapy                    |
| 5      | music                            |
| 6      | Music                            |
| 7      | Music therapy                    |
| 8      | DEPRESSION                       |
| 9      | MENTIA                           |
| 10     | depression                       |
| 11     | agitation                        |
| 12     | Alzheimer disease                |
| 13     | memory                           |
| 14     | cognition                        |
| 15     | Alzheimer's                      |
| 16     | cognitive function               |
| 17     | individualized music             |
| 18     | anxiety                          |
| 19     | Memory                           |
| 20     | BPSD                             |
| 21     | singing                          |
| 22     | Mild cognitive impairment        |
| 23     | autobiographical memory          |
| 24     | emotion                          |
| 25     | long-term care                   |
| 26     | Cognition                        |
| 27     | nursing homes                    |
| 28     | elderly                          |
| 29     | Mnemonics                        |
| 30     | Non-pharmacological intervention |
| 31     | intervention                     |
| 32     | quality of life                  |
| 33     | music intervention               |
| 34     | Cognitive training               |
| 35     | aging                            |
| 36     | Emotion                          |
| 37     | Anxiety                          |
| 38     | MEMORY                           |
| 39     | MANAGEMENT                       |
| 40     | older                            |
| 41     | playlists                        |
| 42     | nonpharmacological interventions |
| 43     | THERAPY                          |

|    |                                 |
|----|---------------------------------|
| 44 | INDIVIDUALS                     |
| 45 | functional independence measure |
| 46 | SYMPTOMS                        |
| 47 | musical training                |
| 48 | Mild cognitive                  |
| 49 | older adults                    |
| 50 | qualitative                     |
| 51 | musical memory                  |
| 52 | person-centered                 |
| 53 | FEASIBILITY                     |
| 54 | SCALE                           |
| 55 | DEPRESSION                      |
| 56 | EFFICACY                        |
| 57 | music stimulation               |
| 58 | Japanese music                  |
| 59 | REHABILITATION                  |
| 60 | well-being                      |
| 61 | Activities of daily living      |
| 62 | cognitive impairment            |
| 63 | Aged                            |
| 64 | meta-analysis                   |
| 65 | caregiver                       |
| 66 | Aging                           |
| 67 | microswitch                     |
| 68 | mild cognitive impairment       |
| 69 | Alzheimer's disease (AD)        |
| 70 | brain rehabilitation            |
| 71 | communication                   |
| 72 | Art therapy                     |
| 73 | live music                      |
| 74 | PEOPLE                          |
| 75 | elderly people                  |
| 76 | Rehabilitation                  |
| 77 | auditory                        |
| 78 | reward                          |
| 79 | Music reminiscence activity     |
| 80 | behavioral                      |
| 81 | selfregulation                  |
| 82 | multisensory                    |
| 83 | residential                     |
| 84 | behavioral symptoms             |
| 85 | motor                           |
| 86 | homes for the aged              |
| 87 | human aging                     |

|     |                                   |
|-----|-----------------------------------|
| 88  | magnetic resonance imaging        |
| 89  | healthcare                        |
| 90  | group singing                     |
| 91  | immediate                         |
| 92  | long-term effect                  |
| 93  | implicit memory                   |
| 94  | listening to music                |
| 95  | intervention design               |
| 96  | incidental falls                  |
| 97  | individual differences            |
| 98  | intuition                         |
| 99  | interdisciplinary collaboration   |
| 100 | logopenic                         |
| 101 | karaoke                           |
| 102 | language                          |
| 103 | individualized music intervention |
| 104 | listening                         |
| 105 | meaningful                        |
| 106 | controlled                        |
| 107 | ecological momentary assessment   |
| 108 | development                       |
| 109 | dementia-related apathy           |
| 110 | dementia and cognitive            |
| 111 | dance                             |
| 112 | daily living                      |
| 113 | culturally appropriate            |
| 114 | crossover design                  |
| 115 | cross-platform                    |
| 116 | critical synthesis                |
| 117 | creative aging                    |
| 118 | cooking                           |
| 119 | effectiveness                     |
| 120 | consolidation                     |
| 121 | concept analysis                  |
| 122 | community-based cognitive         |
| 123 | color                             |
| 124 | cognitive training                |
| 125 | cognitive therapy                 |
| 126 | cognitive reserve                 |
| 127 | cognitive rehabilitation          |
| 128 | cognitive impairments             |
| 129 | cognitive functions               |
| 130 | cognitive functioning             |
| 131 | cognitive dysfunction             |

|     |                                     |
|-----|-------------------------------------|
| 132 | group activity                      |
| 133 | families                            |
| 134 | group                               |
| 135 | global music approach in            |
| 136 | geriatric nursing                   |
| 137 | frontotemporal                      |
| 138 | frail older adults                  |
| 139 | folk recreation program             |
| 140 | focus group                         |
| 141 | feelings                            |
| 142 | family caregivers                   |
| 143 | family caregiver                    |
| 144 | family                              |
| 145 | elderly care                        |
| 146 | falls                               |
| 147 | fMRI                                |
| 148 | exergame                            |
| 149 | exercise with music                 |
| 150 | executive function                  |
| 151 | event-related                       |
| 152 | ethnography                         |
| 153 | ethnicity                           |
| 154 | environment                         |
| 155 | engagement                          |
| 156 | embodiment                          |
| 157 | elders                              |
| 158 | music listening                     |
| 159 | recall                              |
| 160 | senior                              |
| 161 | self-care                           |
| 162 | schizophrenia                       |
| 163 | scales                              |
| 164 | s disease                           |
| 165 | resting-state fMRI                  |
| 166 | residential care                    |
| 167 | reminiscence                        |
| 168 | recreational activities             |
| 169 | recollection                        |
| 170 | recognition memory                  |
| 171 | sensor                              |
| 172 | rapid aging model                   |
| 173 | randomized trial                    |
| 174 | randomized controlled               |
| 175 | quantitative methods and statistics |

|     |                                         |
|-----|-----------------------------------------|
| 176 | quality of                              |
| 177 | qualitative research                    |
| 178 | psychotropic medication                 |
| 179 | psychosocial interventions              |
| 180 | psychometric evaluation                 |
| 181 | pseudo-dementia                         |
| 182 | preferred music                         |
| 183 | pragmatic clinical                      |
| 184 | technology                              |
| 185 | workforce                               |
| 186 | wellbeing                               |
| 187 | wandering                               |
| 188 | voxel-based                             |
| 189 | videogame                               |
| 190 | video game                              |
| 191 | verbal learning                         |
| 192 | valence                                 |
| 193 | training                                |
| 194 | therapy                                 |
| 195 | temporal lobe                           |
| 196 | single-case design                      |
| 197 | support                                 |
| 198 | supplementary motor area                |
| 199 | speech therapy                          |
| 200 | socioemotional                          |
| 201 | social psychology                       |
| 202 | social interaction                      |
| 203 | social agency                           |
| 204 | social                                  |
| 205 | smartphones                             |
| 206 | sleep disorders                         |
| 207 | sleep                                   |
| 208 | medical humanities                      |
| 209 | music activities                        |
| 210 | neurologic music therapy                |
| 211 | neurocognitive disorders                |
| 212 | neurobiological mechanisms of action of |
| 213 | near-infrared                           |
| 214 | narrative                               |
| 215 | musical                                 |
| 216 | music-based therapeutic                 |
| 217 | music therapy and dementia              |
| 218 | music program                           |
| 219 | music care                              |

|     |                                   |
|-----|-----------------------------------|
| 220 | music and art                     |
| 221 | non-pharmacological               |
| 222 | movement music therapy            |
| 223 | movement                          |
| 224 | motor abilities                   |
| 225 | motivation                        |
| 226 | models of care                    |
| 227 | mnemonic                          |
| 228 | misidentification delusion        |
| 229 | mind-body                         |
| 230 | methodology                       |
| 231 | memory complaints                 |
| 232 | melody                            |
| 233 | positivity bias                   |
| 234 | observation                       |
| 235 | positive behaviour                |
| 236 | popular songs                     |
| 237 | pitch                             |
| 238 | picture colouring                 |
| 239 | personal psychology               |
| 240 | person-centered care              |
| 241 | participatory                     |
| 242 | outcome measure                   |
| 243 | older people                      |
| 244 | old people                        |
| 245 | observed emotion rating scale     |
| 246 | non-pharmacological intervention  |
| 247 | nursing staff                     |
| 248 | nursing intervention              |
| 249 | nursing home residents            |
| 250 | nursing facility                  |
| 251 | nursing care                      |
| 252 | nursing                           |
| 253 | nurse                             |
| 254 | nonpharmacological treatment      |
| 255 | nonpharmacological                |
| 256 | nonpharmacologic                  |
| 257 | non-pharmacological interventions |
| 258 | ACTIVATIONS                       |
| 259 | Front-temporal dementia           |
| 260 | ICT                               |
| 261 | Hypertension                      |
| 262 | Home care                         |
| 263 | Healthcare                        |

|     |                                                    |
|-----|----------------------------------------------------|
| 264 | Group therapy                                      |
| 265 | Group music intervention                           |
| 266 | Global Music Approach to Dementia                  |
| 267 | Gait                                               |
| 268 | GENERATIVE MENTIA                                  |
| 269 | GAD-7                                              |
| 270 | Fuzzy logic                                        |
| 271 | Frontotemporal                                     |
| 272 | IMPACT                                             |
| 273 | FTLD                                               |
| 274 | Environmental sounds                               |
| 275 | Emotions                                           |
| 276 | Elderly                                            |
| 277 | Efficacy                                           |
| 278 | EMOTION                                            |
| 279 | EMA                                                |
| 280 | EEG                                                |
| 281 | Depression                                         |
| 282 | Dementia patient                                   |
| 283 | Dementia and cognitive disorders                   |
| 284 | DEMENTIA                                           |
| 285 | DANCE                                              |
| 286 | M-health                                           |
| 287 | Musician                                           |
| 288 | Music intervention                                 |
| 289 | Mood                                               |
| 290 | Milieu therapy                                     |
| 291 | Mexican American                                   |
| 292 | Memantine                                          |
| 293 | Meditation                                         |
| 294 | MILD                                               |
| 295 | MENT                                               |
| 296 | MCI                                                |
| 297 | MARIO                                              |
| 298 | INTERVENTIONS                                      |
| 299 | M MENSCH                                           |
| 300 | M DIS                                              |
| 301 | Live music performance                             |
| 302 | Learning                                           |
| 303 | Language                                           |
| 304 | LIVE                                               |
| 305 | LIS DC, 1992, J CLIN EXP NEUROPSYC, V14, P463, DOI |
| 306 | KNOWLEDGE                                          |
| 307 | Japan                                              |

|     |                                                          |
|-----|----------------------------------------------------------|
| 308 | Intimate contact                                         |
| 309 | Intervention                                             |
| 310 | Initiative                                               |
| 311 | Musicophilia                                             |
| 312 | Alzheimer's dementia                                     |
| 313 | Behavioral and psychological symptoms of dementia (BPSD) |
| 314 | Behavioral and                                           |
| 315 | Behavior                                                 |
| 316 | BRAIN                                                    |
| 317 | BLIND                                                    |
| 318 | BEHAVIOR                                                 |
| 319 | Autobiography                                            |
| 320 | Auditory stimulation                                     |
| 321 | Assisted living                                          |
| 322 | Arts therapies                                           |
| 323 | Aptitude                                                 |
| 324 | Apathy                                                   |
| 325 | Behavioral disorders                                     |
| 326 | Alzheimer's Dementia                                     |
| 327 | Alzheimer's                                              |
| 328 | Alzheimer Disease                                        |
| 329 | Agitation                                                |
| 330 | Ageing                                                   |
| 331 | Aged care                                                |
| 332 | Affect                                                   |
| 333 | Aesthetic preferences                                    |
| 334 | Active music therapy                                     |
| 335 | ATTENTION                                                |
| 336 | ANXIETY                                                  |
| 337 | ANALGESIA                                                |
| 338 | Controlled trial                                         |
| 339 | Chronic pain                                             |
| 340 | Continuing care                                          |
| 341 | Comprehensive                                            |
| 342 | Complementary and alternative medicine                   |
| 343 | Companion robot                                          |
| 344 | Communication                                            |
| 345 | Cognitive stimuli                                        |
| 346 | Cognitive stimulation                                    |
| 347 | Cognitive interventions                                  |
| 348 | Cognitive intervention                                   |
| 349 | Cognitive function                                       |
| 350 | Cognitive aspects                                        |



|     |                               |
|-----|-------------------------------|
| 351 | Binding                       |
| 352 | Chromogranin A                |
| 353 | Cholinesterase inhibitors     |
| 354 | Caregiving                    |
| 355 | Caregivers                    |
| 356 | Caregiver burden              |
| 357 | Care activities               |
| 358 | Canon chord progression       |
| 359 | CORRELATE                     |
| 360 | CONVERSION                    |
| 361 | COMMUNITY                     |
| 362 | CAREGIVERS                    |
| 363 | Biomarkers                    |
| 364 | cognitive                     |
| 365 | agitated behaviour            |
| 366 | audio-based technology        |
| 367 | attention                     |
| 368 | assessment                    |
| 369 | arts-based therapies          |
| 370 | arts                          |
| 371 | arousal                       |
| 372 | app                           |
| 373 | antipsychotics                |
| 374 | antipsychotic agents          |
| 375 | amyotrophic lateral sclerosis |
| 376 | amusia                        |
| 377 | agitation disruptiveness      |
| 378 | auditory perception           |
| 379 | agitated behavior             |
| 380 | agitated                      |
| 381 | aged care                     |
| 382 | adaptive network-based fuzzy  |
| 383 | acupuncture                   |
| 384 | abstraction                   |
| 385 | World Cafe                    |
| 386 | Wiimote                       |
| 387 | Wellbeing                     |
| 388 | Video-based exercise          |
| 389 | Veterans                      |
| 390 | Vascular encephalopathy       |
| 391 | VBM                           |
| 392 | behavioural disturbance       |
| 393 | chair yoga                    |
| 394 | caring                        |

|     |                                                    |
|-----|----------------------------------------------------|
| 395 | carer                                              |
| 396 | caregivers                                         |
| 397 | caregiver distress                                 |
| 398 | care practice                                      |
| 399 | care homes                                         |
| 400 | care giving                                        |
| 401 | care                                               |
| 402 | burden                                             |
| 403 | brain                                              |
| 404 | auditory scene analysis                            |
| 405 | behavioural change                                 |
| 406 | behavioural and psychological symptoms of dementia |
| 407 | behavioural and psychological symptoms of          |
| 408 | behaviour analytics                                |
| 409 | behaviour                                          |
| 410 | behavioral problems                                |
| 411 | behavioral and psychotic symptoms of dementia      |
| 412 | behavioral and psychological symptoms of dementia  |
| 413 | behavioral and psychological symptoms              |
| 414 | behavioral and psychiatric symptoms of dementia    |
| 415 | behavior                                           |
| 416 | awareness                                          |
| 417 | Neuropsychiatric                                   |
| 418 | PROGRAM                                            |
| 419 | RCT                                                |
| 420 | Quality of life                                    |
| 421 | Psychosocial interventions                         |
| 422 | Prosody                                            |
| 423 | Posterior cortical atrophy                         |
| 424 | Piano                                              |
| 425 | Physical exercise                                  |
| 426 | Personalized music listening                       |
| 427 | Personalized music                                 |
| 428 | Person-centered care                               |
| 429 | Pain                                               |
| 430 | RECOGNITION                                        |
| 431 | PRESERVATION                                       |
| 432 | POWER                                              |
| 433 | PERFORMANCE                                        |
| 434 | PAULO PR, 1978, ANN NEUROL, V4, P225               |
| 435 | PAMO B, 1990, AUSTRALAS J EDUC TEC, V6, P36        |
| 436 | Older people nursing                               |
| 437 | Older adults                                       |
| 438 | Older                                              |

439 Nursing  
440 Note density  
441 Non-pharmacological interventions  
442 Neuropsychiatric symptoms  
443 VALIDATION  
444 Senile dementia  
445 Usability  
446 Treatment  
447 Traditional opera  
448 Tonality  
449 TERMINANTS  
450 Subjective cognitive decline  
451 Structural group  
452 Song  
453 Social robot  
454 Severe  
455 Sensor  
456 RENZI E, 1962, BRAIN, V85, P665, DOI  
10.1093/brain/85.4.665  
457 Semantic dementia  
458 STAM protocol  
459 SOUTO BARRETO P, 2015, AGEING RES REV, V24, P274  
460 SINGAPORE  
461 S C EXPL, P33  
462 Rhythmic exercise  
463 Reward  
464 Reminiscence therapy  
465 Relationship  
466 Recognition memory  
467 Randomised  
468 RISK
